# Supplementary material for: Performance of Mapping Approaches for Whole-Genome Bisulfite Sequencing Data in Crop Plants
Source: Front Plant Sci. 2020 Feb 28;11:176. doi: 10.3389/fpls.2020.00176 (PMC7093021; doi:10.3389/fpls.2020.00176)
Supplement: Supplementary file 1 [file Table_1.csv]

# results of the quality benchmark per species	conversion rate	error rate and allowed number of mismatches
	mapper	conversionRate	errorRate	mismatches	macroAvgPrecision	matchedReads	gnsize	genome
1	bismarkbwt2	100	0.1	X	0.999951652147	0.976332606570935	135670229	Arabidopsis thaliana
2	bismark	100	0.1	0	0.998817191899	0.972232959043327	135670229	Arabidopsis thaliana
3	bsmap	100	0.1	0	0.999957853574	0.747824356417253	135670229	Arabidopsis thaliana
4	bsseeker2	100	0.1	0	0.995610089592	0.753767297461049	135670229	Arabidopsis thaliana
5	bwameth	100	0.1	X	0.974008203978	0.99999690425753	135670229	Arabidopsis thaliana
6	gem3	100	0.1	0	0.962574186165	0.999924375433957	135670229	Arabidopsis thaliana
7	gsnap	100	0.1	0	0.973651022681	0.769325172366518	135670229	Arabidopsis thaliana
9	bismark	100	0.1	1	0.998387466149	0.976854018052601	135670229	Arabidopsis thaliana
10	bsmap	100	0.1	1	0.999982653653	0.960931287784642	135670229	Arabidopsis thaliana
11	bsseeker2	100	0.1	1	0.996059193436	0.964632469031519	135670229	Arabidopsis thaliana
12	gem3	100	0.1	1	0.963690158935	0.999992039519364	135670229	Arabidopsis thaliana
13	gsnap	100	0.1	1	0.963538139748	0.9761658787265	135670229	Arabidopsis thaliana
15	bismark	100	0.1	2	0.998343627708	0.976871265760646	135670229	Arabidopsis thaliana
16	bsmap	100	0.1	2	0.999993416743	0.975434399005824	135670229	Arabidopsis thaliana
17	bsseeker2	100	0.1	2	0.994364290295	0.980336286081984	135670229	Arabidopsis thaliana
18	gem3	100	0.1	2	0.963860573393	0.999996019759682	135670229	Arabidopsis thaliana
19	gsnap	100	0.1	2	0.954658785775	0.996592914287736	135670229	Arabidopsis thaliana
21	bismark	100	0.1	3	0.998343622364	0.976868170018176	135670229	Arabidopsis thaliana
22	bsmap	100	0.1	3	0.999993420968	0.976071237456715	135670229	Arabidopsis thaliana
23	bsseeker2	100	0.1	3	0.993372851014	0.981825338209865	135670229	Arabidopsis thaliana
24	gem3	100	0.1	3	0.963870587955	0.999996019759682	135670229	Arabidopsis thaliana
25	gsnap	100	0.1	3	0.953634202717	0.99810850135107	135670229	Arabidopsis thaliana
26	bismarkbwt2	100	0.5	X	0.99678275963	0.976030550555686	135670229	Arabidopsis thaliana
27	bismark	100	0.5	0	0.998828816397	0.970947783669516	135670229	Arabidopsis thaliana
28	bsmap	100	0.5	0	0.999945187248	0.23097157666164	135670229	Arabidopsis thaliana
29	bsseeker2	100	0.5	0	0.995595986365	0.232823272907389	135670229	Arabidopsis thaliana
30	bwameth	100	0.5	X	0.973213116859	0.99999690425753	135670229	Arabidopsis thaliana
31	gem3	100	0.5	0	0.883061584967	0.999706788963236	135670229	Arabidopsis thaliana
32	gsnap	100	0.5	0	0.972821737449	0.237745503434063	135670229	Arabidopsis thaliana
34	bismark	100	0.5	1	0.998436331702	0.975474643657929	135670229	Arabidopsis thaliana
35	bsmap	100	0.5	1	0.999937369862	0.697763547190171	135670229	Arabidopsis thaliana
36	bsseeker2	100	0.5	1	0.997227701564	0.700049974128438	135670229	Arabidopsis thaliana
37	gem3	100	0.5	1	0.888638400195	0.999874401305519	135670229	Arabidopsis thaliana
38	gsnap	100	0.5	1	0.915045361893	0.681332672908273	135670229	Arabidopsis thaliana
40	bismark	100	0.5	2	0.998413489067	0.975468009924066	135670229	Arabidopsis thaliana
41	bsmap	100	0.5	2	0.999932950225	0.916412742076005	135670229	Arabidopsis thaliana
42	bsseeker2	100	0.5	2	0.995331769855	0.920281977914089	135670229	Arabidopsis thaliana
43	gem3	100	0.5	2	0.891996394416	0.99996240884144	135670229	Arabidopsis thaliana
44	gsnap	100	0.5	2	0.8627376821	0.872806555898053	135670229	Arabidopsis thaliana
46	bismark	100	0.5	3	0.998403705696	0.975479508396096	135670229	Arabidopsis thaliana
47	bsmap	100	0.5	3	0.999932203074	0.967034765187934	135670229	Arabidopsis thaliana
48	bsseeker2	100	0.5	3	0.993964315403	0.972198463627237	135670229	Arabidopsis thaliana
49	gem3	100	0.5	3	0.893203192026	0.999987617030122	135670229	Arabidopsis thaliana
50	gsnap	100	0.5	3	0.844777934636	0.919479296116612	135670229	Arabidopsis thaliana
51	bismarkbwt2	100	0	X	0.999997230866	0.976364890742403	135670229	Arabidopsis thaliana
52	bismark	100	0	0	0.998786726642	0.976936276352508	135670229	Arabidopsis thaliana
53	bsmap	100	0	0	0.999960831539	0.972061366460726	135670229	Arabidopsis thaliana
54	bsseeker2	100	0	0	0.99561617358	0.979825488574499	135670229	Arabidopsis thaliana
55	bwameth	100	0	X	0.973992204264	0.999997788755379	135670229	Arabidopsis thaliana
56	gem3	100	0	0	0.973914201121	0.999995135261833	135670229	Arabidopsis thaliana
57	gsnap	100	0	0	0.973847244359	0.999939854146305	135670229	Arabidopsis thaliana
59	bismark	100	0	1	0.998333031512	0.977080891750731	135670229	Arabidopsis thaliana
60	bsmap	100	0	1	0.999994227777	0.975816059827434	135670229	Arabidopsis thaliana
61	bsseeker2	100	0	1	0.995599271195	0.979834333552984	135670229	Arabidopsis thaliana
62	gem3	100	0	1	0.973914201121	0.999995135261833	135670229	Arabidopsis thaliana
63	gsnap	100	0	1	0.973847619798	0.999971696068849	135670229	Arabidopsis thaliana
65	bismark	100	0	2	0.998282763123	0.977098139458776	135670229	Arabidopsis thaliana
66	bsmap	100	0	2	1	0.97605398974867	135670229	Arabidopsis thaliana
67	bsseeker2	100	0	2	0.994141841152	0.981121277922491	135670229	Arabidopsis thaliana
68	gem3	100	0	2	0.973914201121	0.999995135261833	135670229	Arabidopsis thaliana
69	gsnap	100	0	2	0.973846160007	0.999983194540879	135670229	Arabidopsis thaliana
71	bismark	100	0	3	0.998282763123	0.977098139458776	135670229	Arabidopsis thaliana
72	bsmap	100	0	3	1	0.976103963877108	135670229	Arabidopsis thaliana
73	bsseeker2	100	0	3	0.993280149013	0.981913787994711	135670229	Arabidopsis thaliana
74	gem3	100	0	3	0.973914306552	0.999995135261833	135670229	Arabidopsis thaliana
75	gsnap	100	0	3	0.973845614777	0.999987617030122	135670229	Arabidopsis thaliana
76	bismarkbwt2	100	1	X	0.982930827631	0.974788715576449	135670229	Arabidopsis thaliana
77	bismark	100	1	0	0.998956686146	0.968718406842475	135670229	Arabidopsis thaliana
78	bsmap	100	1	0	0.999900134288	0.052079675566189	135670229	Arabidopsis thaliana
79	bsseeker2	100	1	0	0.995511790489	0.052499369795283	135670229	Arabidopsis thaliana
80	bwameth	100	1	X	0.971778214434	0.999999115502152	135670229	Arabidopsis thaliana
81	gem3	100	1	0	0.78858492552	0.999613916689148	135670229	Arabidopsis thaliana
82	gsnap	100	1	0	0.972479042891	0.053642583264416	135670229	Arabidopsis thaliana
84	bismark	100	1	1	0.998701510847	0.973131166608437	135670229	Arabidopsis thaliana
85	bsmap	100	1	1	0.99989909176	0.337424872963997	135670229	Arabidopsis thaliana
86	bsseeker2	100	1	1	0.997762109699	0.338442045489724	135670229	Arabidopsis thaliana
87	gem3	100	1	1	0.795651310522	0.999712980448175	135670229	Arabidopsis thaliana
88	gsnap	100	1	1	0.883068888446	0.321919625680511	135670229	Arabidopsis thaliana
90	bismark	100	1	2	0.99867064659	0.973133820101983	135670229	Arabidopsis thaliana
91	bsmap	100	1	2	0.999873574243	0.694819053852652	135670229	Arabidopsis thaliana
92	bsseeker2	100	1	2	0.996021944794	0.697268228395034	135670229	Arabidopsis thaliana
93	gem3	100	1	2	0.803331670142	0.999859364842095	135670229	Arabidopsis thaliana
94	gsnap	100	1	2	0.80461378684	0.578025977701809	135670229	Arabidopsis thaliana
95	bismark	100	1	3	0.998688922932	0.973143107329391	135670229	Arabidopsis thaliana
96	bsmap	100	1	3	0.999858099542	0.892514494708492	135670229	Arabidopsis thaliana
97	bsseeker2	100	1	3	0.994628550285	0.896638465926932	135670229	Arabidopsis thaliana
98	gem3	100	1	3	0.80846635765	0.999950468120486	135670229	Arabidopsis thaliana
99	gsnap	100	1	3	0.762260874438	0.694747851775851	135670229	Arabidopsis thaliana
300	bismarkbwt2	100	0.1	X	0.999854930861	0.915819590876391	738357821	Brassica napus
301	bismark	100	0.1	0	0.997643780641	0.912596844310356	738357821	Brassica napus
302	bsmap	100	0.1	0	0.999590468948	0.701662275435088	738357821	Brassica napus
303	bsseeker2	100	0.1	0	0.994343650977	0.708107443521486	738357821	Brassica napus
304	bwameth	100	0.1	X	0.896423670709	0.999998862340152	738357821	Brassica napus
305	gem3	100	0.1	0	0.896584168833	0.99533852003293	738357821	Brassica napus
306	gsnap	100	0.1	0	0.90502614815	0.769696528422847	738357821	Brassica napus
307	bismark	100	0.1	1	0.99669703799	0.916952781346734	738357821	Brassica napus
308	bsmap	100	0.1	1	0.999476754622	0.90064012056594	738357821	Brassica napus
309	bsseeker2	100	0.1	1	0.994935629832	0.905807534119841	738357821	Brassica napus
310	gem3	100	0.1	1	0.894874881881	0.999489271989523	738357821	Brassica napus
311	gsnap	100	0.1	1	0.895707503248	0.975088337255687	738357821	Brassica napus
312	bismark	100	0.1	2	0.996485898484	0.91701900940219	738357821	Brassica napus
313	bsmap	100	0.1	2	0.999306313059	0.914253277049508	738357821	Brassica napus
314	bsseeker2	100	0.1	2	0.992329543034	0.921077042081144	738357821	Brassica napus
315	gem3	100	0.1	2	0.894902821328	0.999788882836719	738357821	Brassica napus
316	gsnap	100	0.1	2	0.887646180748	0.995228085766226	738357821	Brassica napus
317	bismark	100	0.1	3	0.996486390527	0.917018440572266	738357821	Brassica napus
318	bsmap	100	0.1	3	0.9991029022	0.914955700744428	738357821	Brassica napus
319	bsseeker2	100	0.1	3	0.990993404785	0.922673422632589	738357821	Brassica napus
320	gem3	100	0.1	3	0.894891898235	0.999810985942344	738357821	Brassica napus
321	gsnap	100	0.1	3	0.886101054856	0.997095148100153	738357821	Brassica napus
322	bismarkbwt2	100	0.5	X	0.996329548581	0.915748405874453	738357821	Brassica napus
323	bismark	100	0.5	0	0.997575007011	0.91145154588877	738357821	Brassica napus
324	bsmap	100	0.5	0	0.999409923493	0.216528929917959	738357821	Brassica napus
325	bsseeker2	100	0.5	0	0.993934523384	0.218564934739362	738357821	Brassica napus
326	bwameth	100	0.5	X	0.895910709184	0.999999187385823	738357821	Brassica napus
327	gem3	100	0.5	0	0.825213226242	0.982602824338087	738357821	Brassica napus
328	gsnap	100	0.5	0	0.900132368675	0.237862571177892	738357821	Brassica napus
329	bismark	100	0.5	1	0.99678742878	0.915702168127761	738357821	Brassica napus
330	bsmap	100	0.5	1	0.999293158239	0.653595659275101	738357821	Brassica napus
331	bsseeker2	100	0.5	1	0.996181131376	0.656783869738597	738357821	Brassica napus
332	gem3	100	0.5	1	0.830003152225	0.992323640173467	738357821	Brassica napus
333	gsnap	100	0.5	1	0.848824086466	0.677800916515026	738357821	Brassica napus
334	bismark	100	0.5	2	0.996605385609	0.915767421046203	738357821	Brassica napus
335	bsmap	100	0.5	2	0.999135008435	0.858860212727765	738357821	Brassica napus
336	bsseeker2	100	0.5	2	0.993417163748	0.864387045532316	738357821	Brassica napus
337	gem3	100	0.5	2	0.832923089825	0.995720367434877	738357821	Brassica napus
338	gsnap	100	0.5	2	0.801910598029	0.868024875420152	738357821	Brassica napus
339	bismark	100	0.5	3	0.996603368589	0.915763195452481	738357821	Brassica napus
340	bsmap	100	0.5	3	0.998939232851	0.906629737144505	738357821	Brassica napus
341	bsseeker2	100	0.5	3	0.991513949762	0.913708500504999	738357821	Brassica napus
342	gem3	100	0.5	3	0.833954906444	0.996490481890771	738357821	Brassica napus
343	gsnap	100	0.5	3	0.78395136323	0.915534038254462	738357821	Brassica napus
344	bismarkbwt2	100	0	X	0.999991133219	0.915614812103693	738357821	Brassica napus
345	bismark	100	0	0	0.997568377051	0.916820081451569	738357821	Brassica napus
346	bsmap	100	0	0	0.999622842848	0.911574656936641	738357821	Brassica napus
347	bsseeker2	100	0	0	0.99447806934	0.919861452533215	738357821	Brassica napus
348	bwameth	100	0	X	0.896503637452	0.999998537294481	738357821	Brassica napus
349	gem3	100	0	0	0.904124978495	0.999999674954329	738357821	Brassica napus
350	gsnap	100	0	0	0.905907773973	0.999991630073973	738357821	Brassica napus
351	bismark	100	0	1	0.996461369996	0.916980085183094	738357821	Brassica napus
352	bsmap	100	0	1	0.999525030774	0.914360542120921	738357821	Brassica napus
353	bsseeker2	100	0	1	0.994443740997	0.919887618709726	738357821	Brassica napus
354	gem3	100	0	1	0.904124291363	0.999999756215747	738357821	Brassica napus
355	gsnap	100	0	1	0.905901512938	0.99999748089605	738357821	Brassica napus
356	bismark	100	0	2	0.996218797886	0.917048669819664	738357821	Brassica napus
357	bsmap	100	0	2	0.999306246176	0.91466868541698	738357821	Brassica napus
358	bsseeker2	100	0	2	0.992101703742	0.921656517251027	738357821	Brassica napus
359	gem3	100	0	2	0.904122993417	0.999999756215747	738357821	Brassica napus
360	gsnap	100	0	2	0.905900018629	0.999998618555898	738357821	Brassica napus
361	bismark	100	0	3	0.996218797886	0.917048669819664	738357821	Brassica napus
362	bsmap	100	0	3	0.999112820444	0.914828039057163	738357821	Brassica napus
363	bsseeker2	100	0	3	0.990923065879	0.922622146677997	738357821	Brassica napus
364	gem3	100	0	3	0.904117834387	0.999999756215747	738357821	Brassica napus
365	gsnap	100	0	3	0.90589951555	0.999999024862987	738357821	Brassica napus
366	bismarkbwt2	100	1	X	0.981688719983	0.914657227557079	738357821	Brassica napus
367	bismark	100	1	0	0.997532664236	0.909437806695827	738357821	Brassica napus
368	bsmap	100	1	0	0.999179031689	0.048971462046489	738357821	Brassica napus
369	bsseeker2	100	1	0	0.993361378918	0.049446678817416	738357821	Brassica napus
370	bwameth	100	1	X	0.894233600969	0.999997643418886	738357821	Brassica napus
371	gem3	100	1	0	0.733725945135	0.97612815835705	738357821	Brassica napus
372	gsnap	100	1	0	0.893381449404	0.053956850024659	738357821	Brassica napus
373	bismark	100	1	1	0.996896781601	0.913529969170231	738357821	Brassica napus
374	bsmap	100	1	1	0.999041368733	0.317509974635874	738357821	Brassica napus
375	bsseeker2	100	1	1	0.996681773495	0.318928311421057	738357821	Brassica napus
376	gem3	100	1	1	0.746246381715	0.983489142621345	738357821	Brassica napus
377	gsnap	100	1	1	0.817662103638	0.321241417676942	738357821	Brassica napus
378	bismark	100	1	2	0.996765704455	0.913576938269683	738357821	Brassica napus
379	bsmap	100	1	2	0.998868135946	0.651796694009238	738357821	Brassica napus
380	bsseeker2	100	1	2	0.99441715029	0.655365045384908	738357821	Brassica napus
381	gem3	100	1	2	0.755463925203	0.988786493182208	738357821	Brassica napus
382	gsnap	100	1	2	0.74741023901	0.575331975238346	738357821	Brassica napus
383	bismark	100	1	3	0.996779416567	0.913568649605074	738357821	Brassica napus
384	bsmap	100	1	3	0.998679843725	0.836816509199646	738357821	Brassica napus
385	bsseeker2	100	1	3	0.992426046767	0.842585013460548	738357821	Brassica napus
386	gem3	100	1	3	0.760839615512	0.991087816532522	738357821	Brassica napus
387	gsnap	100	1	3	0.708044027877	0.692224168072015	738357821	Brassica napus
564	bismarkbwt2	100	0.1	X	0.999902818764	0.975213593294875	727424546	Solanum tuberosum
565	bismark	100	0.1	0	0.999075358279	0.971615446782025	727424546	Solanum tuberosum
566	bsmap	100	0.1	0	0.999931931501	0.74697119090789	727424546	Solanum tuberosum
567	bsseeker2	100	0.1	0	0.998395026576	0.751432849692776	727424546	Solanum tuberosum
568	bwameth	100	0.1	X	0.971522130446	0.999999752551646	727424546	Solanum tuberosum
569	gem3	100	0.1	0	0.961312566379	0.998933910008972	727424546	Solanum tuberosum
570	gsnap	100	0.1	0	0.972005161774	0.769169040383736	727424546	Solanum tuberosum
571	bismark	100	0.1	1	0.998907274683	0.975917006481992	727424546	Solanum tuberosum
572	bsmap	100	0.1	1	0.999927431849	0.95909200311257	727424546	Solanum tuberosum
573	bsseeker2	100	0.1	1	0.998524448808	0.962028555210099	727424546	Solanum tuberosum
574	gem3	100	0.1	1	0.962083218721	0.999894916932413	727424546	Solanum tuberosum
575	gsnap	100	0.1	1	0.961911040426	0.975959567598849	727424546	Solanum tuberosum
576	bismark	100	0.1	2	0.998795508238	0.975976394086908	727424546	Solanum tuberosum
577	bsmap	100	0.1	2	0.999917300275	0.973584640781699	727424546	Solanum tuberosum
578	bsseeker2	100	0.1	2	0.997784086681	0.976923791350888	727424546	Solanum tuberosum
579	gem3	100	0.1	2	0.962218823444	0.999963130195281	727424546	Solanum tuberosum
580	gsnap	100	0.1	2	0.953269775824	0.996225010396955	727424546	Solanum tuberosum
581	bismark	100	0.1	3	0.99879546539	0.975976476569693	727424546	Solanum tuberosum
582	bsmap	100	0.1	3	0.999907432492	0.974218026084686	727424546	Solanum tuberosum
583	bsseeker2	100	0.1	3	0.997424392645	0.977844794123794	727424546	Solanum tuberosum
584	gem3	100	0.1	3	0.962222541013	0.999968079162358	727424546	Solanum tuberosum
585	gsnap	100	0.1	3	0.952260982167	0.997744838186098	727424546	Solanum tuberosum
586	bismarkbwt2	100	0.5	X	0.996657205008	0.975196106944539	727424546	Solanum tuberosum
587	bismark	100	0.5	0	0.99902013394	0.97049764008505	727424546	Solanum tuberosum
588	bsmap	100	0.5	0	0.999852298383	0.229638423516436	727424546	Solanum tuberosum
589	bsseeker2	100	0.5	0	0.998234154499	0.231025289056795	727424546	Solanum tuberosum
590	bwameth	100	0.5	X	0.971197772242	0.999999835034431	727424546	Solanum tuberosum
591	gem3	100	0.5	0	0.881014176832	0.995844599794354	727424546	Solanum tuberosum
592	gsnap	100	0.5	0	0.970442169792	0.236614569990025	727424546	Solanum tuberosum
593	bismark	100	0.5	1	0.998908203118	0.974721748450272	727424546	Solanum tuberosum
594	bsmap	100	0.5	1	0.999846357246	0.695210604118761	727424546	Solanum tuberosum
595	bsseeker2	100	0.5	1	0.998811226064	0.697316059678604	727424546	Solanum tuberosum
596	gem3	100	0.5	1	0.88727304427	0.998343250788412	727424546	Solanum tuberosum
597	gsnap	100	0.5	1	0.913024412261	0.679262062818559	727424546	Solanum tuberosum
598	bismark	100	0.5	2	0.99880492686	0.974778496606081	727424546	Solanum tuberosum
599	bsmap	100	0.5	2	0.999823905459	0.914268878371051	727424546	Solanum tuberosum
600	bsseeker2	100	0.5	2	0.998057845996	0.917166168663108	727424546	Solanum tuberosum
601	gem3	100	0.5	2	0.890952663074	0.999234642241644	727424546	Solanum tuberosum
602	gsnap	100	0.5	2	0.861325322216	0.870837403171397	727424546	Solanum tuberosum
603	bismark	100	0.5	3	0.998803571716	0.97477866157165	727424546	Solanum tuberosum
604	bsmap	100	0.5	3	0.999815975194	0.965308235691588	727424546	Solanum tuberosum
605	bsseeker2	100	0.5	3	0.997568114925	0.968725332492229	727424546	Solanum tuberosum
606	gem3	100	0.5	3	0.892164387999	0.999422125611053	727424546	Solanum tuberosum
607	gsnap	100	0.5	3	0.843330987867	0.917676572134247	727424546	Solanum tuberosum
608	bismarkbwt2	100	0	X	0.9999931306	0.975120222782702	727424546	Solanum tuberosum
609	bismark	100	0	0	0.999058713508	0.976258072796336	727424546	Solanum tuberosum
610	bsmap	100	0	0	0.999935761601	0.971095557790656	727424546	Solanum tuberosum
611	bsseeker2	100	0	0	0.998397371672	0.976932946939979	727424546	Solanum tuberosum
612	bwameth	100	0	X	0.971488906038	0.999999835034431	727424546	Solanum tuberosum
613	gem3	100	0	0	0.972206728253	1	727424546	Solanum tuberosum
614	gsnap	100	0	0	0.972177586588	0.999995710895201	727424546	Solanum tuberosum
615	bismark	100	0	1	0.998869250665	0.976052855628238	727424546	Solanum tuberosum
616	bsmap	100	0	1	0.999939739632	0.973916056610245	727424546	Solanum tuberosum
617	bsseeker2	100	0	1	0.998374850588	0.976953650118915	727424546	Solanum tuberosum
618	gem3	100	0	1	0.972206360959	1	727424546	Solanum tuberosum
619	gsnap	100	0	1	0.972174580741	0.999998267861523	727424546	Solanum tuberosum
620	bismark	100	0	2	0.998729215711	0.976114057854415	727424546	Solanum tuberosum
621	bsmap	100	0	2	0.999930312483	0.974140162336018	727424546	Solanum tuberosum
622	bsseeker2	100	0	2	0.997716765456	0.977559156240705	727424546	Solanum tuberosum
623	gem3	100	0	2	0.972205578016	1	727424546	Solanum tuberosum
624	gsnap	100	0	2	0.972173533873	0.9999989277238	727424546	Solanum tuberosum
625	bismark	100	0	3	0.998729215711	0.976114057854415	727424546	Solanum tuberosum
626	bsmap	100	0	3	0.999916414235	0.974189816972351	727424546	Solanum tuberosum
627	bsseeker2	100	0	3	0.997391921121	0.977873085718914	727424546	Solanum tuberosum
628	gem3	100	0	3	0.972205639039	1	727424546	Solanum tuberosum
629	gsnap	100	0	3	0.972173533873	0.9999989277238	727424546	Solanum tuberosum
630	bismarkbwt2	100	1	X	0.982436211684	0.973901622122939	727424546	Solanum tuberosum
631	bismark	100	1	0	0.998965132137	0.968312671120847	727424546	Solanum tuberosum
632	bsmap	100	1	0	0.999730046826	0.051679588694646	727424546	Solanum tuberosum
633	bsseeker2	100	1	0	0.998047935999	0.052003581072576	727424546	Solanum tuberosum
634	bwameth	100	1	X	0.969355120697	0.999999835034431	727424546	Solanum tuberosum
635	gem3	100	1	0	0.784782134631	0.994009440319664	727424546	Solanum tuberosum
636	gsnap	100	1	0	0.967718867787	0.053346978185448	727424546	Solanum tuberosum
637	bismark	100	1	1	0.998905837613	0.97243111903899	727424546	Solanum tuberosum
638	bsmap	100	1	1	0.999709323558	0.336318770227872	727424546	Solanum tuberosum
639	bsseeker2	100	1	1	0.998913333806	0.337339659652936	727424546	Solanum tuberosum
640	gem3	100	1	1	0.793709060397	0.996196966250189	727424546	Solanum tuberosum
641	gsnap	100	1	1	0.880730986717	0.320988849812211	727424546	Solanum tuberosum
642	bismark	100	1	2	0.998829578549	0.972474834914831	727424546	Solanum tuberosum
643	bsmap	100	1	2	0.999695286864	0.692575444116181	727424546	Solanum tuberosum
644	bsseeker2	100	1	2	0.998298006425	0.69456781577833	727424546	Solanum tuberosum
645	gem3	100	1	2	0.802901226809	0.997755066051389	727424546	Solanum tuberosum
646	gsnap	100	1	2	0.802945937261	0.576288822378437	727424546	Solanum tuberosum
647	bismark	100	1	3	0.998829353003	0.972472360431293	727424546	Solanum tuberosum
648	bsmap	100	1	3	0.999680090333	0.890384420915589	727424546	Solanum tuberosum
649	bsseeker2	100	1	3	0.997771854666	0.893273545411969	727424546	Solanum tuberosum
650	gem3	100	1	3	0.808370000782	0.998406597566989	727424546	Solanum tuberosum
651	gsnap	100	1	3	0.760785085649	0.69290191097765	727424546	Solanum tuberosum
828	bismarkbwt2	100	0.1	X	0.987829853767	0.946828200674515	955377461	Glycine max.
829	bismark	100	0.1	0	0.976750355979	0.944100923208481	955377461	Glycine max.
830	bsmap	100	0.1	0	0.985020418734	0.720171132798617	955377461	Glycine max.
831	bsseeker2	100	0.1	0	0.978627403322	0.733433968653454	955377461	Glycine max.
832	bwameth	100	0.1	X	0.916390980875	0.999999246365551	955377461	Glycine max.
833	gem3	100	0.1	0	0.915152160986	0.989349323949077	955377461	Glycine max.
834	gsnap	100	0.1	0	0.918593366544	0.769017321596984	955377461	Glycine max.
835	bismark	100	0.1	1	0.97190692169	0.949361166058389	955377461	Glycine max.
836	bsmap	100	0.1	1	0.98424926416	0.927994310562331	955377461	Glycine max.
837	bsseeker2	100	0.1	1	0.98002054062	0.93875646170887	955377461	Glycine max.
838	gem3	100	0.1	1	0.910431300155	0.99892669893855	955377461	Glycine max.
839	gsnap	100	0.1	1	0.909794543137	0.972761892524317	955377461	Glycine max.
840	bismark	100	0.1	2	0.971355103133	0.949469312601855	955377461	Glycine max.
841	bsmap	100	0.1	2	0.983371223206	0.943488469612737	955377461	Glycine max.
842	bsseeker2	100	0.1	2	0.977516107468	0.955017946234337	955377461	Glycine max.
843	gem3	100	0.1	2	0.909995766486	0.999721155253784	955377461	Glycine max.
844	gsnap	100	0.1	2	0.90061847055	0.993419452397905	955377461	Glycine max.
845	bismark	100	0.1	3	0.971356323525	0.949470317447787	955377461	Glycine max.
846	bsmap	100	0.1	3	0.982861162095	0.944816436315157	955377461	Glycine max.
847	bsseeker2	100	0.1	3	0.976428218963	0.956599762140407	955377461	Glycine max.
848	gem3	100	0.1	3	0.909891969849	0.999806441552288	955377461	Glycine max.
849	gsnap	100	0.1	3	0.898227677515	0.995792019249834	955377461	Glycine max.
850	bismarkbwt2	100	0.5	X	0.983088278774	0.94666127064401	955377461	Glycine max.
851	bismark	100	0.5	0	0.977652316573	0.94243909644505	955377461	Glycine max.
852	bsmap	100	0.5	0	0.981390725069	0.221629886479415	955377461	Glycine max.
853	bsseeker2	100	0.5	0	0.974887976246	0.225726203725353	955377461	Glycine max.
854	bwameth	100	0.5	X	0.915389733451	0.999998618336843	955377461	Glycine max.
855	gem3	100	0.5	0	0.855083449792	0.957972067669591	955377461	Glycine max.
856	gsnap	100	0.5	0	0.910871652533	0.236971748568204	955377461	Glycine max.
857	bismark	100	0.5	1	0.973692097506	0.947265183049329	955377461	Glycine max.
858	bsmap	100	0.5	1	0.982617370404	0.672474738958298	955377461	Glycine max.
859	bsseeker2	100	0.5	1	0.980453441723	0.67926316406264	955377461	Glycine max.
860	gem3	100	0.5	1	0.849534637568	0.984435690142945	955377461	Glycine max.
861	gsnap	100	0.5	1	0.860719044523	0.670578217866801	955377461	Glycine max.
862	bismark	100	0.5	2	0.973296290698	0.947345884738268	955377461	Glycine max.
863	bsmap	100	0.5	2	0.982296044514	0.885947348962079	955377461	Glycine max.
864	bsseeker2	100	0.5	2	0.977934666223	0.895674697206949	955377461	Glycine max.
865	gem3	100	0.5	2	0.848661738237	0.99372517677281	955377461	Glycine max.
866	gsnap	100	0.5	2	0.809952721954	0.860523679225796	955377461	Glycine max.
867	bismark	100	0.5	3	0.973287814835	0.947345382315302	955377461	Glycine max.
868	bsmap	100	0.5	3	0.981631185122	0.936281086557491	955377461	Glycine max.
869	bsseeker2	100	0.5	3	0.976339179431	0.947169345868535	955377461	Glycine max.
870	gem3	100	0.5	3	0.848224746073	0.996048066553961	955377461	Glycine max.
871	gsnap	100	0.5	3	0.78857836271	0.909949978141461	955377461	Glycine max.
872	bismarkbwt2	100	0	X	0.988147672442	0.946668430171278	955377461	Glycine max.
873	bismark	100	0	0	0.975767507276	0.948926570192665	955377461	Glycine max.
874	bsmap	100	0	0	0.98590884858	0.936662865208899	955377461	Glycine max.
875	bsseeker2	100	0	0	0.979575759256	0.953846735497357	955377461	Glycine max.
876	bwameth	100	0	X	0.916400871238	0.999999560379905	955377461	Glycine max.
877	gem3	100	0	0	0.919233075212	0.999902529944566	955377461	Glycine max.
878	gsnap	100	0	0	0.920540169763	0.99999673425072	955377461	Glycine max.
879	bismark	100	0	1	0.970167667027	0.949944667530709	955377461	Glycine max.
880	bsmap	100	0	1	0.98434724537	0.942540899898567	955377461	Glycine max.
881	bsseeker2	100	0	1	0.979413713031	0.953931582175767	955377461	Glycine max.
882	gem3	100	0	1	0.919096963589	0.999998806745455	955377461	Glycine max.
883	gsnap	100	0	1	0.92053795596	0.999998995154068	955377461	Glycine max.
884	bismark	100	0	2	0.969472227666	0.950082394226306	955377461	Glycine max.
885	bsmap	100	0	2	0.983491649405	0.944047289556843	955377461	Glycine max.
886	bsseeker2	100	0	2	0.977432428343	0.955774720827109	955377461	Glycine max.
887	gem3	100	0	2	0.919096589629	0.999999309168422	955377461	Glycine max.
888	gsnap	100	0	2	0.920537596972	0.999999371971292	955377461	Glycine max.
889	bismark	100	0	3	0.969472100105	0.950082457029177	955377461	Glycine max.
890	bsmap	100	0	3	0.98302945832	0.944792005998428	955377461	Glycine max.
891	bsseeker2	100	0	3	0.976512260884	0.956633864099235	955377461	Glycine max.
892	gem3	100	0	3	0.919093330663	0.999999434774163	955377461	Glycine max.
893	gsnap	100	0	3	0.920537596972	0.999999371971292	955377461	Glycine max.
894	bismarkbwt2	100	1	X	0.965960674109	0.944743459379323	955377461	Glycine max.
895	bismark	100	1	0	0.978156048525	0.939953170411382	955377461	Glycine max.
896	bsmap	100	1	0	0.977376823277	0.049959558091368	955377461	Glycine max.
897	bsseeker2	100	1	0	0.970502119411	0.050906122959605	955377461	Glycine max.
898	bwameth	100	1	X	0.913074756006	0.999998995154068	955377461	Glycine max.
899	gem3	100	1	0	0.767702989103	0.939350953683574	955377461	Glycine max.
900	gsnap	100	1	0	0.902365611869	0.053573674895538	955377461	Glycine max.
901	bismark	100	1	1	0.97491692117	0.944480817773765	955377461	Glycine max.
902	bsmap	100	1	1	0.979472150417	0.325145409056764	955377461	Glycine max.
903	bsseeker2	100	1	1	0.978595021928	0.328143932121652	955377461	Glycine max.
904	gem3	100	1	1	0.77014957988	0.963886779235788	955377461	Glycine max.
905	gsnap	100	1	1	0.827467706044	0.31506265936621	955377461	Glycine max.
906	bismark	100	1	2	0.974674765933	0.944524842586175	955377461	Glycine max.
907	bsmap	100	1	2	0.980263677131	0.671001886033012	955377461	Glycine max.
908	bsseeker2	100	1	2	0.977391327343	0.677529176800695	955377461	Glycine max.
909	gem3	100	1	2	0.773446075694	0.980886260295667	955377461	Glycine max.
910	gsnap	100	1	2	0.752975387819	0.567058110679886	955377461	Glycine max.
911	bismark	100	1	3	0.974670033106	0.944525470614882	955377461	Glycine max.
912	bsmap	100	1	3	0.980033135171	0.863561705296398	955377461	Glycine max.
913	bsseeker2	100	1	3	0.976105694372	0.872638227391485	955377461	Glycine max.
914	gem3	100	1	3	0.775709434494	0.988310187649326	955377461	Glycine max.
915	gsnap	100	1	3	0.709469638423	0.685177373205871	955377461	Glycine max.
1092	bismarkbwt2	100	0.1	X	0.991427037172	0.842540322827829	2104350183	Zea mays
1093	bismark	100	0.1	0	0.947079817524	0.845116357962818	2104350183	Zea mays
1094	bsmap	100	0.1	0	0.980616052624	0.641061574647239	2104350183	Zea mays
1095	bsseeker2	100	0.1	0	0.959660839735	0.668180682741691	2104350183	Zea mays
1096	bwameth	100	0.1	X	0.787112615659	0.999996264880211	2104350183	Zea mays
1097	gem3	100	0.1	0	0.802845679963	0.963434859496626	2104350183	Zea mays
1098	gsnap	100	0.1	0	0.794910874156	0.773855661228399	2104350183	Zea mays
1099	bismark	100	0.1	1	0.929981236339	0.851961150306267	2104350183	Zea mays
1100	bsmap	100	0.1	1	0.972043166508	0.822475772544663	2104350183	Zea mays
1101	bsseeker2	100	0.1	1	0.962207385668	0.848992585445071	2104350183	Zea mays
1102	gem3	100	0.1	1	0.7881163931	0.99573979650098	2104350183	Zea mays
1103	gsnap	100	0.1	1	0.786592802157	0.964371576217415	2104350183	Zea mays
1104	bismark	100	0.1	2	0.927997695604	0.852365370102043	2104350183	Zea mays
1105	bsmap	100	0.1	2	0.965992691478	0.837118924759947	2104350183	Zea mays
1106	bsseeker2	100	0.1	2	0.95166099741	0.869657805717488	2104350183	Zea mays
1107	gem3	100	0.1	2	0.78603177703	0.998878123982198	2104350183	Zea mays
1108	gsnap	100	0.1	2	0.776442947195	0.985015697339879	2104350183	Zea mays
1109	bismark	100	0.1	3	0.927996387732	0.852364457706369	2104350183	Zea mays
1110	bsmap	100	0.1	3	0.962716786063	0.839187496826217	2104350183	Zea mays
1111	bsseeker2	100	0.1	3	0.947191713187	0.873852003091995	2104350183	Zea mays
1112	gem3	100	0.1	3	0.785527833775	0.999325882159024	2104350183	Zea mays
1113	gsnap	100	0.1	3	0.771316993079	0.989576905874097	2104350183	Zea mays
1114	bismarkbwt2	100	0.5	X	0.980107956361	0.842285964021444	2104350183	Zea mays
1115	bismark	100	0.5	0	0.951075687726	0.841724783657442	2104350183	Zea mays
1116	bsmap	100	0.5	0	0.97606191606	0.202506875542929	2104350183	Zea mays
1117	bsseeker2	100	0.5	0	0.954887810914	0.211142757618411	2104350183	Zea mays
1118	bwameth	100	0.5	X	0.784641039214	0.99999358471792	2104350183	Zea mays
1119	gem3	100	0.5	0	0.782254421654	0.862036650192888	2104350183	Zea mays
1120	gsnap	100	0.5	0	0.783478838801	0.244909010343516	2104350183	Zea mays
1121	bismark	100	0.5	1	0.937252123102	0.847387082695524	2104350183	Zea mays
1122	bsmap	100	0.5	1	0.970765828891	0.603044869651875	2104350183	Zea mays
1123	bsseeker2	100	0.5	1	0.967686989708	0.618451126798678	2104350183	Zea mays
1124	gem3	100	0.5	1	0.753663420483	0.947979475545273	2104350183	Zea mays
1125	gsnap	100	0.5	1	0.739019651215	0.652923801874078	2104350183	Zea mays
1126	bismark	100	0.5	2	0.935872873558	0.847637934481038	2104350183	Zea mays
1127	bsmap	100	0.5	2	0.964407796235	0.788360015251834	2104350183	Zea mays
1128	bsseeker2	100	0.5	2	0.95509670223	0.814991048685633	2104350183	Zea mays
1129	gem3	100	0.5	2	0.743819675379	0.978416424969726	2104350183	Zea mays
1130	gsnap	100	0.5	2	0.688336915967	0.833087875136827	2104350183	Zea mays
1131	bismark	100	0.5	3	0.935863389727	0.847638846876711	2104350183	Zea mays
1132	bsmap	100	0.5	3	0.959572311329	0.83208535187808	2104350183	Zea mays
1133	bsseeker2	100	0.5	3	0.947848398907	0.863820412247167	2104350183	Zea mays
1134	gem3	100	0.5	3	0.739429900461	0.9868813183935	2104350183	Zea mays
1135	gsnap	100	0.5	3	0.660119144588	0.887390728856734	2104350183	Zea mays
1136	bismarkbwt2	100	0	X	0.992579405261	0.842427870061056	2104350183	Zea mays
1137	bismark	100	0	0	0.943541669693	0.850221810516347	2104350183	Zea mays
1138	bsmap	100	0	0	0.981642313269	0.828566441351505	2104350183	Zea mays
1139	bsseeker2	100	0	0	0.960710962702	0.86361711908614	2104350183	Zea mays
1140	bwameth	100	0	X	0.787613206553	0.999996949176966	2104350183	Zea mays
1141	gem3	100	0	0	0.795907459518	0.998095174444778	2104350183	Zea mays
1142	gsnap	100	0	0	0.79783569059	0.999998374795206	2104350183	Zea mays
1143	bismark	100	0	1	0.923981382976	0.853704196703611	2104350183	Zea mays
1144	bsmap	100	0	1	0.971776918772	0.835112424111846	2104350183	Zea mays
1145	bsseeker2	100	0	1	0.95940158077	0.864231674597048	2104350183	Zea mays
1146	gem3	100	0	1	0.793752168467	0.999971173999187	2104350183	Zea mays
1147	gsnap	100	0	1	0.797835111703	0.999999002067232	2104350183	Zea mays
1148	bismark	100	0	2	0.921518682692	0.854215794065225	2104350183	Zea mays
1149	bsmap	100	0	2	0.96638852938	0.837781010382977	2104350183	Zea mays
1150	bsseeker2	100	0	2	0.950971577944	0.871187921774502	2104350183	Zea mays
1151	gem3	100	0	2	0.793728681782	0.999989878110496	2104350183	Zea mays
1152	gsnap	100	0	2	0.797834876127	0.99999928719088	2104350183	Zea mays
1153	bismark	100	0	3	0.921518467556	0.854215908114685	2104350183	Zea mays
1154	bsmap	100	0	3	0.963590065326	0.839168165442883	2104350183	Zea mays
1155	bsseeker2	100	0	3	0.947262926283	0.874303867049352	2104350183	Zea mays
1156	gem3	100	0	3	0.79372018632	0.999992415710963	2104350183	Zea mays
1157	gsnap	100	0	3	0.797834690293	0.999999515289798	2104350183	Zea mays
1158	bismarkbwt2	100	1	X	0.949116365539	0.838210349572142	2104350183	Zea mays
1159	bismark	100	1	0	0.953740945951	0.83819495289515	2104350183	Zea mays
1160	bsmap	100	1	0	0.971432519421	0.047381961874806	2104350183	Zea mays
1161	bsseeker2	100	1	0	0.950057374886	0.049397957140384	2104350183	Zea mays
1162	bwameth	100	1	X	0.780654819608	0.999992358686233	2104350183	Zea mays
1163	gem3	100	1	0	0.717152344175	0.802902034109171	2104350183	Zea mays
1164	gsnap	100	1	0	0.773545556433	0.05743123038581	2104350183	Zea mays
1165	bismark	100	1	1	0.942274632208	0.84322955222215	2104350183	Zea mays
1166	bsmap	100	1	1	0.966916792782	0.299076715454269	2104350183	Zea mays
1167	bsseeker2	100	1	1	0.96779979734	0.305571661081617	2104350183	Zea mays
1168	gem3	100	1	1	0.703800196025	0.882474883529128	2104350183	Zea mays
1169	gsnap	100	1	1	0.708583281585	0.308690913790784	2104350183	Zea mays
1170	bismark	100	1	2	0.941407271087	0.84340162434372	2104350183	Zea mays
1171	bsmap	100	1	2	0.961666190952	0.605049402946804	2104350183	Zea mays
1172	bsseeker2	100	1	2	0.957331069489	0.622421559134231	2104350183	Zea mays
1173	gem3	100	1	2	0.694988742638	0.936410212866758	2104350183	Zea mays
1174	gsnap	100	1	2	0.636740276651	0.550212769245468	2104350183	Zea mays
1175	bismark	100	1	3	0.941423476996	0.843392871047726	2104350183	Zea mays
1176	bsmap	100	1	3	0.956335250952	0.771354499563376	2104350183	Zea mays
1177	bsseeker2	100	1	3	0.94943912904	0.797137917416387	2104350183	Zea mays
1178	gem3	100	1	3	0.690107208571	0.961119569937737	2104350183	Zea mays
1179	gsnap	100	1	3	0.589879501463	0.668934749253568	2104350183	Zea mays
